# Supplementary material for: Breeding scheme and maternal small RNAs affect the efficiency of transgenerational inheritance of a paramutation in mice
Source: Springer Nature journal article supplement (doi:10.1038/srep09266), 2015-03-18
Supplement: 41598_2015_BFsrep09266_MOESM1_ESM.pdf [file 41598_2015_BFsrep09266_MOESM1_ESM.pdf]

# **Breeding scheme and maternal small RNAs affect the efficiency of transgenerational inheritance of a paramutation in mice**

Shuiqiao Yuan<sup>1</sup>, Daniel Oliver<sup>1</sup>, Andrew Schuster<sup>1</sup>, Huili Zheng<sup>1</sup> and Wei Yan<sup>1,2,3</sup>

<sup>1</sup>Department of Physiology and Cell Biology, University of Nevada School of Medicine, Reno, NV 89557, USA

<sup>2</sup>Department of Biology, University of Nevada, Reno, NV 89557, USA

<sup>3</sup>Co-corresponding authors:

Wei Yan M.D., Ph.D.

*Professor*

Department of Physiology and Cell Biology  
University of Nevada School of Medicine  
Center for Molecular Medicine, Room 207B  
1664 North Virginia Street, MS 0575  
Reno, NV 89557

Tel: 775 784 7765 (Office)

775 784 4688 (Lab)

Fax: 775 784 4362

Email: [wyan@medicine.nevada.edu](mailto:wyan@medicine.nevada.edu)

Figure S1

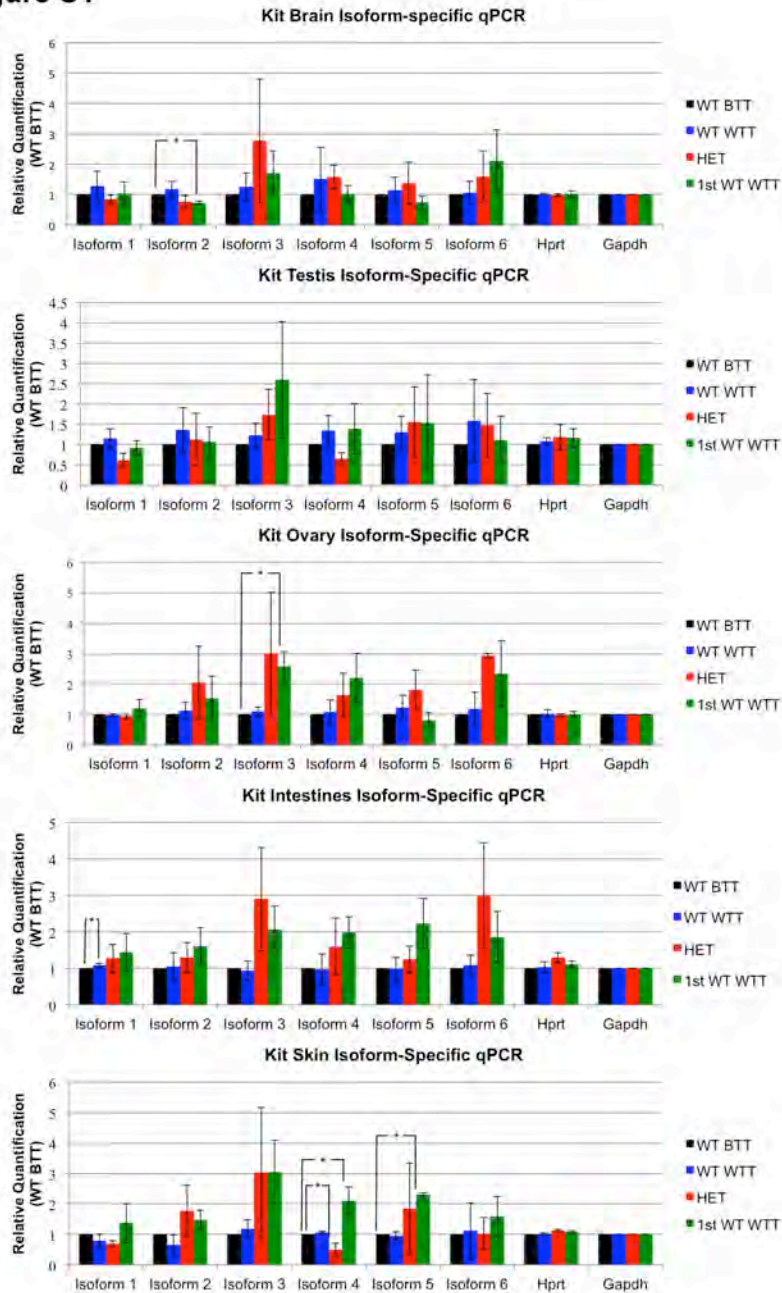

Figure S1. qPCR analyses of levels of six *Kit* isoforms in five tissues (brain, skin, testis, ovary, intestine) in control (WT BTT and WT WTT), and *Kit* paramutant (HET and 1<sup>st</sup> WT WTT) mice. Both *gapdh* and *Hprt* were used as endogenous control references, and the levels of the six isoforms were normalized relative to those in the WT BTT samples. Data are presented as means  $\pm$  SEM. Biological triplicates were analyzed (n=3), and significant differences were determined using Student *t*-test,  $p < 0.05$ .

Figure S2

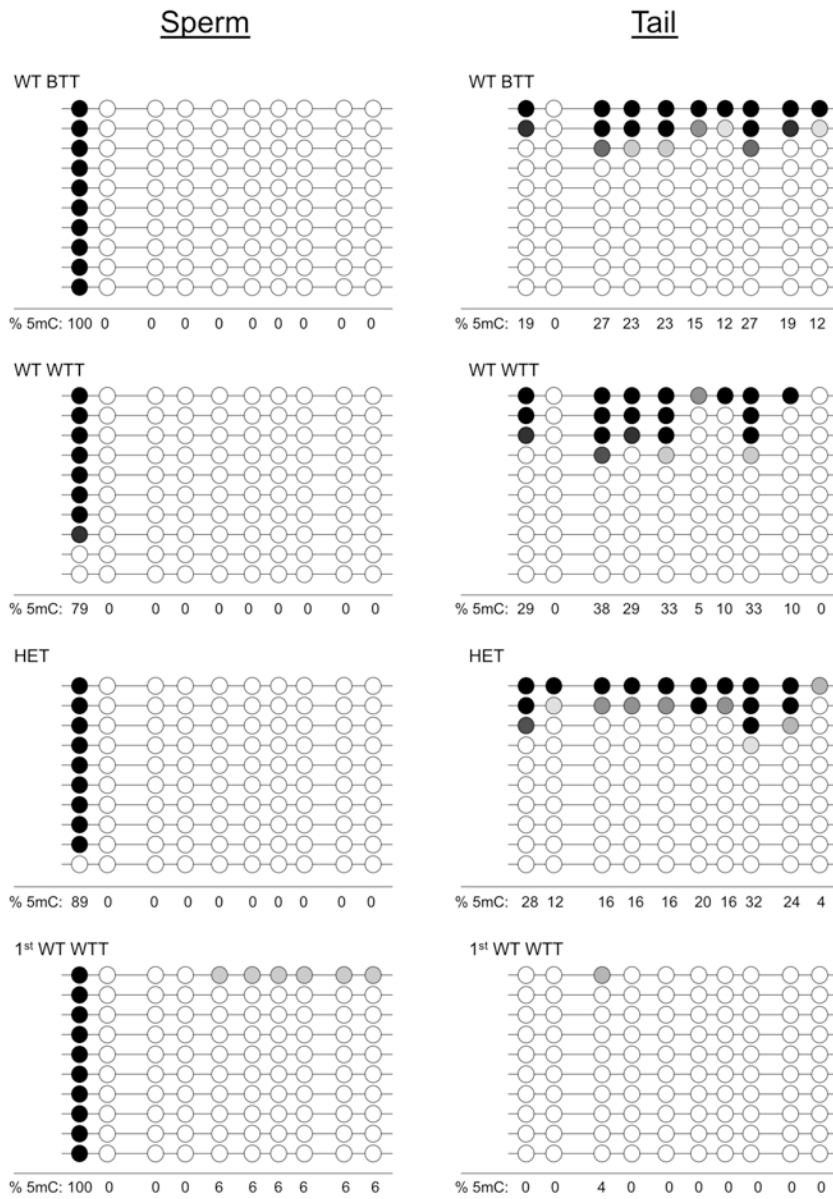

**Figure S2. CpG methylation status of the *Kit* promoter regions in sperm (A) and tail (B) DNA of controls (WT BTT and WT WTT), HET (*Kit*<sup>+/copGFP</sup>) and F1 WT WTT (1<sup>st</sup> WT WTT) mice, as determined by bisulfite sequencing assays.** Vertical columns stand for individual CpGs that are present in this region (10 in total). Each row represents 10% of the clones sequenced. Black dots denote full 100% 5mC, whereas white dots indicate 0%. Gray dots represent 5mC levels in between these two extremes. Average percentages are shown below each panel. Ten clones from biological triplicates were analyzed for each sample set.

Figure S3

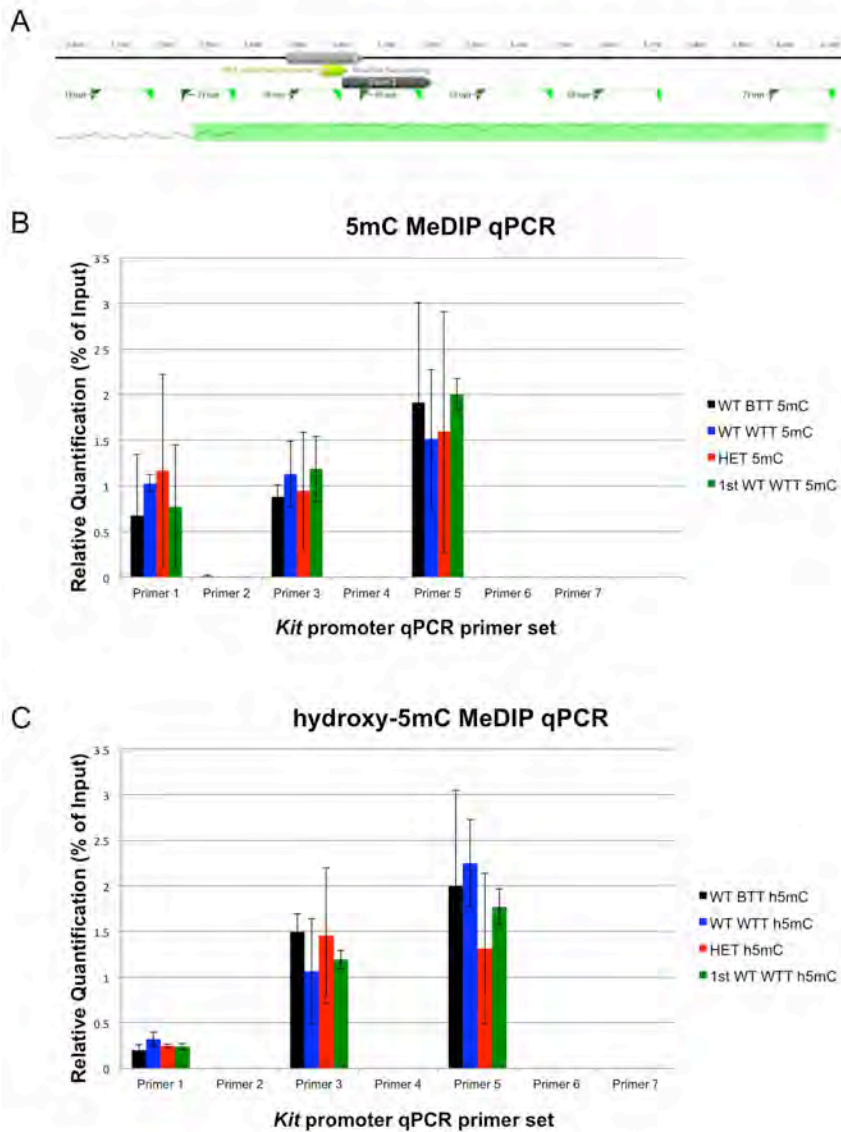

**Figure S3. Levels of 5mC and hydroxyl-5mC methylation in sperm DNA of WT BTT, WT WTT, HET (*Kit*<sup>+/*copGFP*</sup>), and 1st WT WTT (F1 WT WTT) mice.** (A) A schematic diagram of the promoter region of the *Kit* gene. The EPD-predicted promoter region is depicted as a lime green box, and the region that was analyzed using bisulfite sequencing is shown as a light grey box (denoted “Bisulfite Sequencing”), and the primer pairs used in MeDIP-qPCR detection are indicated by the dark green (forward primer) and light green (reverse primer) pairs, 1-7, respectively. (B) 5mC-MeDIP qPCR analyses on sperm DNA. Primer pairs 1, 3, and 5 showed enrichment of DNA in the MeDIP products, relative to equivalent levels of input DNA control. No significant difference was detected between WT BTT samples and any of the three other genotypes. (C) h5mC-MeDIP qPCR analyses on sperm DNA from the four genotypes. No significant differences were observed between the four genotypes.

**Table S1. Oligonucleotides used in qPCR and bisulfite sequencing analyses.**

| qPCR primer set:                  | Fwd Oligo (5'-3')        | Rev Oligo (5'-3')      |
|-----------------------------------|--------------------------|------------------------|
| MeDIP-Opt1                        | CACGCTGGCCAATAGAAATCA    | TGTTGGTAGAGGAGGACGGAT  |
| MeDIP-Opt2                        | CACCTCCACCATAAGCCGAAT    | ACGAGCGCATTAGGTACGG    |
| MeDIP-Opt3                        | CTCCTGGTCTTAGAGGGCACA    | CCACGCCCCTCCCTTCTCC    |
| MeDIP-Opt4                        | CTAGTGGCTCTGGGGGCTC      | AACAGGACGCAGAGCAGATC   |
| MeDIP-Opt5                        | TTTTCCCATGCCTACCACCTC    | AAAGCATCACCAAACCTCGCC  |
| MeDIP-Opt6                        | TTGTTAAAAGTTGCGCGTGGG    | CAGTTGCGTCCCCAGCACT    |
| MeDIP-Opt7                        | GTGTTGTTGCTGCCACGC       | CAAAGCTGGGGAGAACTGACT  |
| Coding Isoforms (1&2)             | AGACAGCCACGTCTCAGCCAT    | AGTCCATCTGACAAAGTCGGG  |
| Isoform 1                         | CTGGGAGGAGGGCTGGAGG      | CGCTAGACTCTGAGCTCCTCT  |
| Isoform 2                         | AACTGGTGGTTCAGAGTTCCA    | GGCCTGGATTTGCTCTTTGTT  |
| Isoform 3                         | GAGGCGGGATTATCTAAGGTA    | CGAGTCACGCTTCCTTCTCAA  |
| Isoform 4                         | ACCCTGCCTTCTCCTTCTTA     | AAATGGGCACTTGGTTTGAGC  |
| Isoform 5                         | CTGGACAACATACCCACTGCA    | TGCAGGAAGAGAAATAGCCTCA |
| Isoform 6                         | TACACCCTCTGCTTTGGCTTT    | CAGTCCTTCTTACAGTGGG    |
| Gapdh Control                     | AACTTTGGCATTGTGGAAGG     | CACATTGGGGGTAGGAACAC   |
| Hprt Control                      | TCAGTCAACGGGGACATAAA     | GGGGCTGTAAGCTTAACCAG   |
| <i>Kit</i> promoter bisulfite PCR | TTGTGGGGGTTTTTGGTTTTAGAG | CACTAACGACGCGGACAAC    |
